# Supplementary material for: JNK3 quantification in plasma: a novel biomarker for neuronal damage in Parkinson’s disease
Source: Springer Nature journal article supplement (doi:10.1038/s41531-025-01224-4), 2025-12-10
Supplement: MOESM1 [file 41531_2025_1224_MOESM1_ESM.xlsx]

## Sheet: NfL
HC				iRBD				DeNovo PD				Late PD
ID	NfL (pg/mL)	Log(NfL)		ID	NfL (pg/mL)	Log(NfL)		ID	NfL (pg/mL)	Log(NfL)		ID	NfL (pg/mL)	Log(NfL)
# 1	13.7565	2.62151		# 1	15.0339	2.71031		# 1	20.1507	3.00324		# 1	12.2128	2.50248
# 2	22.1464	3.09768		# 2	9.27446	2.22727		# 2	27.8308	3.32614		# 2	9.78298	2.28064
# 3	20.1345	3.00244		# 3	23.2143	3.14477		# 3	23.7184	3.16625		# 3	14.4167	2.66839
# 4	18.0534	2.89333		# 4	24.5261	3.19974		# 4	42.3012	3.74482		# 4	26.3962	3.27322
# 5	74.5664	4.31169		# 5	12.5006	2.52577		# 5	34.0696	3.52841		# 5	12.8079	2.55006
# 6	7.8206	2.05676		# 6	9.07624	2.20566		# 6	3.68758	1.30497		# 6	15.0756	2.71307
# 7	6.67061	1.89771		# 7	21.7884	3.08138		# 7	12.6991	2.54153		# 7	28.7603	3.359
# 8	14.3359	2.66277		# 8	12.5743	2.53165		# 8	17.4524	2.85948		# 8	17.3276	2.8523
# 9	13.7157	2.61854		# 9	11.0357	2.40114		# 9	6.93116	1.93603		# 9	15.8909	2.76575
# 10	11.5583	2.44741		# 10	5.94716	1.78291		# 10	13.6371	2.6128		# 10	33.4115	3.5089
# 11	24.2897	3.19005		# 11	9.1914	2.21827		# 11	14.3845	2.66615		# 11	94.1996	4.54542
# 12	5.25772	1.6597		# 12	25.8978	3.25416		# 12	8.44477	2.13355		# 12	28.4007	3.34641
# 13	5.86714	1.76937		# 13	9.35547	2.23596		# 13	15.9566	2.76987		# 13	20.7377	3.03195
# 14	21.9145	3.08715		# 14	15.2609	2.72529		# 14	8.41471	2.12998		# 14	32.2728	3.47422
# 15	14.9498	2.7047		# 15	23.8415	3.17143		# 15	8.2248	2.10715		# 15	7.25264	1.98137
# 16	11.7288	2.46205		# 16	12.1062	2.49372		# 16	12.2755	2.5076		# 16	10.1248	2.31499
# 17	8.92065	2.18837		# 17	12.4908	2.52499		# 17	16.5595	2.80696		# 17	15.5386	2.74333
# 18	15.3112	2.72858		# 18	8.91235	2.18744		# 18	15.644	2.75008		# 18	10.325	2.33456
# 19	7.57106	2.02433		# 19	7.45346	2.00868		# 19	11.3738	2.43131		# 19	4.99992	1.60942
# 20	5.39219	1.68495		# 20	12.4626	2.52273		# 20	18.3271	2.90838		# 20	9.39309	2.23997
# 21	6.00252	1.79218		# 21	13.87	2.62973		# 21	5.73699	1.74693		# 21	8.2761	2.11337
# 22	15.5416	2.74352		# 22	5.96561	1.78601		# 22	17.013	2.83398		# 22	18.8654	2.93733
# 23	10.3626	2.3382		# 23	13.5418	2.60578		# 23	13.4179	2.59659		# 23	11.4264	2.43592
# 24	6.77469	1.91319		# 24	9.90457	2.293		# 24	12.1995	2.5014		# 24	22.2789	3.10364
# 25	9.86846	2.28934		# 25	4.9212	1.59355		# 25	16.5357	2.80552		# 25	31.0483	3.43554
# 26	8.39935	2.12816						# 26	6.42979	1.86094		# 26	6.4265	1.86043
# 27	7.54595	2.02101										# 27	14.1024	2.64635
# 28	9.69316	2.27142										# 28	18.0074	2.89079
												# 29	15.183	2.72018

## Sheet: JNK3
HC				iRBD				DeNovo PD				Late PD
ID	JNK3 (pg/mL)	Log(JNK3)		ID	JNK3 (pg/mL)	Log(JNK3)		ID	JNK3 (pg/mL)	Log(JNK3)		ID	JNK3 (pg/mL)	Log(JNK3)
# 1	230.61	2.306		# 1	767.98	7.68		# 1	916.02	9.16		# 1	429.96	4.3
# 2	271.59	2.716		# 2	827.57	8.276		# 2	406.45	4.064		# 2	509.7	5.097
# 3	287.64	2.876		# 3	707.86	7.079		# 3	256.35	2.563		# 3	405.02	4.05
# 4	195.67	1.957		# 4	757.81	7.578		# 4	537.97	5.38		# 4	985.43	9.854
# 5	484.76	4.848		# 5	925.52	9.255		# 5	605.48	6.055		# 5	1128.71	11.287
# 6	208.69	2.087		# 6	651.84	6.518		# 6	734.98	7.35		# 6	756.38	7.564
# 7	446.16	4.462		# 7	1316.96	13.17		# 7	405.98	4.06		# 7	582.77	5.828
# 8	359.12	3.591		# 8	1762.64	17.626		# 8	360.86	3.609		# 8	957	9.57
# 9	416.62	4.166		# 9	863.61	8.636		# 9	781.37	7.814		# 9	688.08	6.881
# 10	333.55	3.336		# 10	905.72	9.057		# 10	1453.98	14.54		# 10	1054.16	10.542
# 11	604.56	6.046		# 11	688.59	6.886		# 11	1272.89	12.729		# 11	1188.68	11.887
# 12	687.34	6.873		# 12	130.06	1.301		# 12	1139.62	11.396		# 12	1079.67	10.797
# 13	671.64	6.716		# 13	161.57	1.616		# 13	1016.69	10.167		# 13	962.99	9.63
# 14	351.77	3.518		# 14	400.51	4.005		# 14	592.43	5.924		# 14	1356.92	13.569
# 15	440.64	4.406		# 15	334.54	3.345		# 15	877.17	8.772		# 15	1025.61	10.256
# 16	276.06	2.761		# 16	546.96	5.47		# 16	944.26	9.443		# 16	1009.2	10.092
# 17	388.72	3.887		# 17	434.06	4.341		# 17	1000.81	10.008		# 17	1119.28	11.193
# 18	32.36	0.324		# 18	555.34	5.553		# 18	846.87	8.469		# 18	1088.06	10.881
# 19	249.99	2.5		# 19	482.8	4.828		# 19	1478.45	14.785		# 19	1233.84	12.338
# 20	665.14	6.651		# 20	253.16	2.532		# 20	763.9	7.639		# 20	322.07	3.221
# 21	386.48	3.865		# 21	438.14	4.381		# 21	544.24	5.442		# 21	799.04	7.99
# 22	666.26	6.663		# 22	445.4	4.454		# 22	433.61	4.336		# 22	373.99	3.74
# 23	431.5	4.315		# 23	339.08	3.391		# 23	230.72	2.307		# 23	351.77	3.518
# 24	501.19	5.012		# 24	1436.28	14.363		# 24	456.96	4.57		# 24	526.1	5.261
# 25	686.02	6.86		# 25	1378.7	13.787		# 25	593.2	5.932		# 25	211.67	2.117
# 26	484.91	4.849						# 26	313.69	3.137		# 26	304.39	3.044
# 27	346.65	3.467										# 27	882.96	8.83
# 28	451.2	4.512										# 28	694.37	6.944
												# 29	785.18	7.852
